# Supplementary material for: Chromosome Unipolar Division and Low Expression of Tws May Cause Parthenogenesis of Rice Water Weevil (Lissorhoptrus oryzophilus Kuschel)
Source: MDPI journal article supplement (doi:10.3390/insects12040278), 2021-03-24
Supplement: s1 [file s1]

## Supplemental Information

**Table S3 Gene cloning and Q-PCR experimental procedure**

### **Gene cloning and Q-PCR experimental procedure of parthenogenetic RWW.**

#### 1. Gene cloning

Use the cDNA obtained by reverse transcription as a template for gene cloning. The reaction process is as follows:

Composition of PCR reaction solution (50  $\mu$ L)

| Reagent                          | Dosage           |
|----------------------------------|------------------|
| TaKaRa <i>Taq</i> (5 U/ $\mu$ l) | 0.25 $\mu$ l     |
| 10X PCR Buffer ( $Mg^{2+}$ plus) | 5 $\mu$ l        |
| dNTP Mixture (each 2.5 mM)       | 4 $\mu$ l        |
| Template                         | 1 $\mu$ g        |
| Upstream primer                  | 1 $\mu$ M        |
| Downstream primer                | 1 $\mu$ M        |
| ddH <sub>2</sub> O               | Up to 50 $\mu$ l |

Reaction conditions:

|                      |       |        |             |
|----------------------|-------|--------|-------------|
| Initial denaturation | 98 °C | 2min   |             |
| Denaturation         | 98 °C | 10 sec | } 35 Cycles |
| Annealing            | 50 °C | 30 sec |             |
| Extension            | 72 °C | 30 sec |             |
| Final Extension      | 72 °C | 10 min |             |

Purify PCR products according to the kit instructions (AP-GX-50G, Corning, USA), and ligate it to the PMD18-T vector (9057, 6011, Takara Biotechnology Co. Ltd., Dalian, China). Sequencing by BGI (Shenzhen, China).

## 2. Q-PCR

Real-time quantitative PCR was performed in the StepOnePlus™ Real-time PCR system (Thermo Fisher Scientific, Shanghai, China). TB Green Premix Ex Taq kit (RR420, Takara Biotechnology, Dalian, China) was used to for qRT-PCR with the internal control of  $\beta$ -actin.

Reaction conditions:

|                      |       |        |             |
|----------------------|-------|--------|-------------|
| Initial denaturation | 98 °C | 2min   |             |
| Denaturation         | 98 °C | 10 sec | } 35 Cycles |
| Annealing            | 49 °C | 30 sec |             |
| Extension            | 72 °C | 10 sec |             |
| Final Extension      | 72 °C | 10 min |             |

After each extension, detect the absorbance value.

Data were analyzed by the classic  $2^{-\Delta\Delta C_t}$  method.
