# Supplementary material for: Chromosome Unipolar Division and Low Expression of Tws May Cause Parthenogenesis of Rice Water Weevil (Lissorhoptrus oryzophilus Kuschel)
Source: MDPI journal article supplement (doi:10.3390/insects12040278), 2021-03-24
Supplement: s1 [file s1]

# Supplemental Information

**Table S2 Gene cloning and Q-PCR primer sequence**

| Primer Name                              | Sequence (5'-3')                                    |
|------------------------------------------|-----------------------------------------------------|
| For Gene Clone                           |                                                     |
| <i>REC8</i>                              | F: TTATTCCCATTATTTTGGC<br>R: ACAAAGGCTTCATTGCAATC   |
| <i>Tws</i>                               | F: TTCGACAAATTCGAGTGCTG<br>R: ATCTAAACAGTCCACACTGAT |
| For Q-PCR                                |                                                     |
| <i>REC8_Q_RWW</i>                        | F: TTGAGACTTCTGTTGATGGT<br>R: AGCAGATACTTAGCCTTTTCG |
| <i>Tws_Q_RWW</i>                         | F: GCTACAACAACCTTCCTCCG<br>R: CACACTGATCTCATCCTTCT  |
| <i>REC8_Q_Drosophila melanogaster</i>    | F: AAGAGAACGAGAACGCATT<br>R: GATTCGCTCTCAGGACTTC    |
| <i>Tws_Q_Drosophila melanogaster</i>     | F: ATCAGCGTGGACTGTCTA<br>R: GGTTCCTTGAGGAGTGTT      |
| <i>β-actin_Q_RWW</i>                     | F: AAACACTGTCCTCTCTGG<br>R: GAGTATTTCTTTCTGGG       |
| <i>β-actin_Q_Drosophila melanogaster</i> | F: CCAACCGTGAGAAGATGACC<br>R: GCCGGAGTCCAGAACGATAC  |

The *REC8* and *Tws* primers were used for gene cloning; *REC8\_Q\_RWW*, *Tws\_Q\_RWW*, *REC8\_Q\_Drosophila melanogaster*, *Tw\_Q\_Drosophila melanogaster*, *β-actin\_Q\_RWW*, *β-actin\_Q\_Drosophila melanogaster* primers were used for Q-PCR.
