# Supplementary material for: Chromosome Unipolar Division and Low Expression of Tws May Cause Parthenogenesis of Rice Water Weevil (Lissorhoptrus oryzophilus Kuschel)
Source: MDPI journal article supplement (doi:10.3390/insects12040278), 2021-03-24
Supplement: s1 [file s1]

# Supplemental Information

Table S1 Reagent and Immunostaining experimental procedure

RWW ovarian tissue immunostaining experimental procedure

1. Reagent formula

Formaldehyde/Heptane fixed buffer (800 μ L)

| Reagent      | Dosage |
|--------------|--------|
| Nonodet P-40 | 1 μL   |
| Formaldehyde | 4 μL   |
| 1×PBS        | 195 μL |
| Heptane      | 600 μL |
| Total        | 800 μL |

PBTA (20 ml):

| Reagent             | Dosage      | Final concentration |
|---------------------|-------------|---------------------|
| 10×PBS              | 2 mL        | 1×                  |
| 30% Tween-20        | 200 μL      | 0.1~0.3%            |
| 20% Triton X-100    | 200 μL      | 0.2%                |
| BSA                 | 2 mL        | 1.5%                |
| dd H <sub>2</sub> O | Up to 20 mL |                     |

PBT (100 ml):

| Reagent            | Dosage       | Final concentration |
|--------------------|--------------|---------------------|
| 10×PBS             | 10 mL        | 1×                  |
| 30% Tween-20       | 1 mL         | 0.1~0.3%            |
| 20% Triton X-100   | 1 mL         | 0.2%                |
| ddH <sub>2</sub> O | Up to 100 mL |                     |

Mounting media (500  $\mu$  L):

| Reagent            | Dosage      |
|--------------------|-------------|
| 10 $\times$ PBS    | 50 $\mu$ L  |
| Glycerol           | 200 $\mu$ L |
| ddH <sub>2</sub> O | 250 $\mu$ L |
| Total              | 500 $\mu$ L |

## 2. Steps:

- (1) Anesthetize RWW with CO<sub>2</sub> and dissect the ovarian tissue in 1 $\times$ PBS, immediately, fixed in formaldehyde/Heptane fixed buffer on shaker (100 rpm; TS-2, Haimen Kylin-Bell Lab Instruments Co., Ltd. Jiangsu, China) for 30 mins;
- (2) At room temperature, the ovaries are washed four times on PBT at 100 rpm for 15 minutes each time;
- (3) The ovaries blocked overnight in 4  $^{\circ}$ C, PBTA on a shaker at 100 rpm;
- (4) Repeat step (2), then wash with PBT for 1.5 hours;
- (5) The ovaries incubated 12 hours in  $\alpha$ -Tubulin antibody diluted in PBTA, 4  $^{\circ}$ C, shaker at 100 rpm;
- (6) Discard primary antibody, then repeat step (2);
- (7) The ovaries were incubated in appropriate secondary antibody and DAPI diluted in PBTA for 4 hours, 4 $^{\circ}$ C, shaker at 100 rpm, dark;
- (8) Repeat step (2);
- (9) Take a clean glass slide, drop 20  $\mu$  L of mounting media in the middle, and add the ovaries to the mounting media. Dissect the upper part of the ovarian tissue under a stereoscope, remove excess tissue, and cover with a coverslip. Apply nail polish around the coverslip;
- (10) Take pictures immediately with a fluorescent confocal microscope.
